# Supplementary material for: Normal oil body formation in Marchantia polymorpha requires functional coat protein complex I proteins
Source: Front Plant Sci. 2022 Aug 15;13:979066. doi: 10.3389/fpls.2022.979066 (PMC9420845; doi:10.3389/fpls.2022.979066)
Supplement: Supplementary file 2 [file Data_Sheet_2.xlsx]

## Sheet: Figure1
	Figure 1E														Figure 1I
		Wild type			Mpsec28-1			Mpsec28-2ge			Mpsec28-3ge						MpSEC28 (Mp1g28220)
	mean	0.445			0.821			0.785			0.79						Tak-1	Mpsec28-1
	s.d.	0.0937			0.074			0.1173			0.0875				Biological replicate #1	Technical replicate 1	1.0692	0.2462
	p-value	-			8.23×10-32			2.73×10-24			4.40×10-28					Technical replicate 2	0.9014	0.321
	# of replicates	n = 40			n = 47			n = 44			n = 42					Technical replicate 3	1.0294	0.2051
	Sample id	Circularity	Area μm2	Perimeter μm	Circularity	Area μm2	Perimeter μm	Circularity	Area μm2	Perimeter μm	Circularity	Area μm2	Perimeter μm		Biological replicate #2	Technical replicate 1	0.6958	0.4464
	1	0.377	150.011	70.755	0.83	99.682	38.838	0.898	88.539	35.196	0.637	180.384	59.674			Technical replicate 2	1.6188	0.2095
	2	0.376	84.212	53.073	0.814	86.017	36.436	0.886	83.267	34.358	0.856	87.835	35.909			Technical replicate 3	0.6854	0.1863
	3	0.625	92.761	43.203	0.876	121.45	41.733	0.752	135.612	47.611	0.732	185.596	56.456		Biological replicate #3	Technical replicate 1	1.1289	0.3404
	4	0.455	102.42	53.201	0.827	103.846	39.715	0.774	101.69	40.64	0.754	100.621	40.959			Technical replicate 2	0.9322	0.3427
	5	0.4	177.36	74.671	0.831	101.791	39.24	0.786	124.037	44.538	0.748	151.823	50.508			Technical replicate 3	0.9389	0.2052
	6	0.586	81.163	41.729	0.843	114.809	41.358	0.879	66.242	30.774	0.796	138.198	46.713			mean	1	0.278
	7	0.348	146.977	72.852	0.804	81.219	35.631	0.859	68.378	31.622	0.714	97.746	41.488			s.d.	0.2614	0.0837
	8	0.551	141.267	56.757	0.882	78.996	33.551	0.847	110.575	40.512	0.549	139.217	56.444			p-value		2.731×10-05
	9	0.578	96.982	45.903	0.763	164.729	52.079	0.55	175.163	63.273	0.838	91.931	37.124
	10	0.41	126.54	62.263	0.896	49.244	26.283	0.842	78.27	34.169	0.898	56.537	28.13
	11	0.342	131.917	69.65	0.586	95.121	45.158	0.672	162.996	55.215	0.888	101.999	37.999
	12	0.501	122.347	55.376	0.851	115.647	41.33	0.739	116.83	44.582	0.853	127.642	43.374
	13	0.41	167.861	71.707	0.8	143.511	47.492	0.615	115.056	48.49	0.86	101.609	38.523
	14	0.444	96.947	52.364	0.798	127.936	44.893	0.69	134.304	49.443	0.858	92.846	36.871
	15	0.533	131.224	55.644	0.775	157.149	50.47	0.694	148.974	51.931	0.842	81.825	34.937
	16	0.495	130.998	57.671	0.902	55.132	27.721	0.885	72.944	32.186	0.89	68.88	31.192
	17	0.575	147.56	56.77	0.828	100.548	39.055	0.886	78.597	33.385	0.835	73.539	33.263
	18	0.399	147.444	68.142	0.569	217.146	69.237	0.692	117.092	46.107	0.721	132.681	48.096
	19	0.328	137.563	72.636	0.817	123.837	43.645	0.733	147.834	50.341	0.843	126.647	43.442
	20	0.42	102.58	55.386	0.872	122.397	41.99	0.797	93.491	38.39	0.672	146.975	52.444
	21	0.352	81.125	53.782	0.782	97.582	39.605	0.776	83.103	36.693	0.755	109.329	42.658
	22	0.507	166.578	64.242	0.774	104.491	41.184	0.88	97.343	37.281	0.867	93.589	36.822
	23	0.293	126.338	73.582	0.763	126.726	45.688	0.669	155.041	53.984	0.775	126.533	45.287
	24	0.349	145.719	72.476	0.805	110.293	41.488	0.441	184.585	72.489	0.671	175.293	57.279
	25	0.369	91.852	55.895	0.821	93.83	37.908	0.693	154.561	52.945	0.861	94.629	37.167
	26	0.334	170.926	80.166	0.892	81.015	33.788	0.899	70.289	31.342	0.67	120.61	47.572
	27	0.516	142.782	58.97	0.613	113.96	48.321	0.597	113.8	48.957	0.709	133.223	48.595
	28	0.364	173.284	77.397	0.833	111.548	41.023	0.867	74.062	32.762	0.882	54.744	27.935
	29	0.307	121.48	70.546	0.834	78.365	34.363	0.888	100.021	37.628	0.883	64.965	30.401
	30	0.665	106.069	44.762	0.846	123.9	42.9	0.894	84.652	34.487	0.643	141.427	52.566
	31	0.586	87.541	43.31	0.771	171.339	52.86	0.815	114.707	42.046	0.834	109.998	40.7
	32	0.409	105.571	56.966	0.886	75.631	32.754	0.896	84.411	34.399	0.876	85.407	34.994
	33	0.488	120.336	55.639	0.888	100.814	37.778	0.818	98.564	38.917	0.791	90	37.801
	34	0.414	124.45	61.425	0.898	82.528	33.975	0.782	114.47	42.897	0.731	92.065	39.791
	35	0.428	114.539	57.966	0.883	96.463	37.053	0.896	65.827	30.38	0.741	99.761	41.144
	36	0.539	125.834	54.151	0.869	64.519	30.551	0.705	80.428	37.852	0.744	135.919	47.909
	37	0.41	101.108	55.678	0.827	139.783	46.091	0.489	90.094	48.128	0.681	125.056	48.029
	38	0.413	103.007	56.003	0.751	148.515	49.86	0.862	101.615	38.485	0.889	63.259	29.91
	39	0.385	170.802	74.656	0.771	110.002	42.332	0.899	63.141	29.702	0.88	72.888	32.267
	40	0.537	114.701	51.808	0.839	115.193	41.537	0.898	73.762	32.122	0.886	95.004	36.711
	41				0.824	108.039	40.599	0.903	57.766	28.346	0.764	118.507	44.162
	42				0.89	107.482	38.967	0.897	68.797	31.052	0.873	104.587	38.797
	43				0.896	79.93	33.478	0.758	133.028	46.955
	44				0.824	96.409	38.349	0.857	137.314	44.867
	45				0.901	67.904	30.782
	46				0.864	108.213	39.665
	47				0.871	115.689	40.85

## Sheet: Figure2,S4
	Figure 2A, Supplementary Figure 4A
			MpRET1 (Mp3g00050)
			mock							β-estradiol
			mGFP-MpSYP12B	amiR-Ctrl#3	amiR-Ctrl#5	amiR-MpRET1-1#2	amiR-MpRET1-1#5	amiR-MpRET1-2#4	amiR-MpRET1-2#5	mGFP-MpSYP12B	amiR-Ctrl#3	amiR-Ctrl#5	amiR-MpRET1-1#2	amiR-MpRET1-1#5	amiR-MpRET1-2#4	amiR-MpRET1-2#5
	Biological replicate #1	Technical replicate 1	0.9443	1.1627	0.8869	1.0875	1.0445	0.8768	0.9632	0.9721	1.077	1.1056	0.1485	0.1456	0.1148	0.1584
		Technical replicate 2	1.0557	1.1627	0.9508	0.9331	1.1043	0.8586	0.9566	0.9587	1.0116	1.1133	0.1475	0.155	0.1049	0.1674
		Technical replicate 3	-	1.1627	0.9913	1.0003	1.0445	0.8008	1.0544	-	1.0187	1.0752	0.1424	0.1806	0.1086	0.171
	Biological replicate #2	Technical replicate 1	1.0252	1.2261	1.0753	1.0723	0.9686	1.0569	1.1684	1.1295	1.2222	1.0124	0.1636	0.1526	0.1573	0.1553
		Technical replicate 2	0.9748	1.331	1.1526	0.9875	1.0059	1.0435	1.1318	1.1513	1.1619	1.1929	0.1575	0.1303	0.1449	0.1563
		Technical replicate 3	-	1.1512	1.2199	0.9097	1.0252	0.9311	1.1458	-	1.1119	1.1854	0.1388	0.1605	0.1229	0.1795
	Biological replicate #3	Technical replicate 1	1.0354	1.0625	0.9676	0.9589	0.8935	0.8485	0.978	0.8864	1.1295	1.0195	0.1623	0.1594	0.1385	0.1289
		Technical replicate 2	0.9646	1.0693	1.0251	0.9164	0.9968	0.8111	0.9843	0.9273	0.9994	0.9684	0.1464	0.1281	0.1341	0.141
		Technical replicate 3	-	1.0223	1.0317	0.8988	0.911	0.8322	1.0231	-	1.0523	1	0.1391	0.1534	0.1165	0.1494
		mean	1	1.1501	1.0335	0.9738	0.9994	0.8955	1.0451	1.0042	1.0872	1.0747	0.1496	0.1517	0.1269	0.1564
		s,d,	0.04079	0.08788	0.0973	0.06534	0.06304	0.09021	0.079	0.10019	0.07121	0.07636	0.00891	0.01505	0.01675	0.01459
		p-value		1.277×10-03	0.4074	0.3902	0.9828	1.475×10-02	0.2005		0.1445	0.2121	6.781×10-06	5.993×10-06	4.926×10-06	6.239×10-06
	Figure 2B, Supplementary Figure 4B
			MpSEC21 (Mp1g05250)
			mock							β-estradiol
			mGFP-MpSYP12B	amiR-Ctrl#3	amiR-Ctrl#5	amiR-MpSEC21-1#1	amiR-MpSEC21-1#3	amiR-MpSEC21-2#3	amiR-MpSEC21-2#4	mGFP-MpSYP12B	amiR-Ctrl#3	amiR-Ctrl#5	amiR-MpSEC21-1#1	amiR-MpSEC21-1#3	amiR-MpSEC21-2#3	amiR-MpSEC21-2#4
	Biological replicate #1	Technical replicate 1	1.0537	0.9973	1.0267	0.9989	0.923	1.0183	0.9489	1.2056	1.0371	1.1599	0.0808	0.1172	0.0898	0.1254
		Technical replicate 2	0.9463	0.9775	1.0618	0.9594	0.9806	1.0601	0.9233	1.033	0.9697	1.1835	0.076	0.0914	0.0916	0.1387
		Technical replicate 3	-	1.0739	1.2309	0.8971	1.0487	0.9846	0.9297	-	1.1782	0.9739	0.0665	0.1126	0.098	0.1288
	Biological replicate #2	Technical replicate 1	1.0072	1.0699	0.9635	0.7444	0.8323	0.9294	1.0867	0.8847	0.7853	1.2376	0.105	0.0824	0.103	0.1053
		Technical replicate 2	0.9928	0.9404	0.9097	0.6589	0.9958	0.8227	0.9215	0.7774	0.6469	1.1605	0.0739	0.1029	0.0945	0.088
		Technical replicate 3	-	0.9136	1.0059	0.6979	0.9007	0.9429	1.0188	-	-	1.08	0.0971	0.0818	0.0819	0.0959
	Biological replicate #3	Technical replicate 1	1.0938	1.2641	1.0896	1.011	1.0712	1.2963	1.11	1.2079	1.0403	1.1471	0.0742	0.1213	0.1204	0.1279
		Technical replicate 2	0.9062	1.1353	0.9589	0.872	1.1077	1.2039	1.0104	1.2493	1.0689	1.2187	0.0946	0.1229	0.0958	0.1332
		Technical replicate 3	-	1.2473	1.0324	0.9327	1.0783	1.0109	1.0309	-	1.0905	1.1703	0.1026	0.1181	0.0793	0.1463
		mean	1	1.0688	1.031	0.8636	0.9931	1.0299	0.9978	1.0597	0.9771	1.1479	0.0856	0.1056	0.0949	0.1211
		s.d.	0.06254	0.11948	0.08785	0.12416	0.08759	0.13553	0.06716	0.17806	0.16401	0.07455	0.01344	0.01563	0.01143	0.01884
		p-value		0.1981	0.4711	2.171×10-02	0.8721	0.5997	0.9532		0.4321	0.3323	6.218×10-05	6.791×10-05	6.585×10-05	7.192×10-05
	Figure 2C-J
		mGFP-MpSYP12B		mGFP-MpSYP12B / amiR-Ctrl		mGFP-MpSYP12B / amiR-MpRET1-1		mGFP-MpSYP12B / amiR-MpSEC21-2
	Transgene allele	-		#5		#2		#4
	Condition	mock	β-estradiol	mock	β-estradiol	mock	β-estradiol	mock	β-estradiol
	# of replicates	n = 41	n = 40	n = 40	n = 41	n = 41	n = 42	n = 40	n = 41
	Supplementary Figure 4C-P
		mGFP-MpSYP12B / amiR-Ctrl		mGFP-MpSYP12B / amiR-MpRET1-1		mGFP-MpSYP12B / amiR-MpRET1-2				mGFP-MpSYP12B / amiR-MpSEC21-1				mGFP-MpSYP12B / amiR-MpSEC21-2
	Transgene allele	#3		#5		#4		#5		#1		#3		#3
	Condition	mock	β-estradiol	mock	β-estradiol	mock	β-estradiol	mock	β-estradiol	mock	β-estradiol	mock	β-estradiol	mock	β-estradiol
	# of replicates	n = 40	n = 40	n = 42	n = 40	n = 41	n = 40	n = 41	n = 41	n = 40	n = 41	n = 41	n = 45	n = 40	n = 41

## Sheet: Figure3,S5
	Figure 3E
	Genotype	Tak-1	Mpsec28-1	Mpsec28-2ge	Mpsec28-3ge
	mean	165.552	77.226	78.228	72.374
	s.d.	9.298	17.7042	9.1179	5.2926
	p-value	-	3.64×10-09	8.78×10-14	1.85×10-13
	# of replicates	n = 10	n = 10	n = 10	n = 10
	1	172.657	47.228	70.461	73.189
	2	180.963	67.654	67.682	63.757
	3	153.463	95.204	101.796	72.715
	4	154.259	57.21	79.096	66.007
	5	167.156	78.551	73.408	67.691
	6	163.198	57.172	82.434	71.727
	7	166.784	83.766	77.023	80.873
	8	152.225	94.624	82.836	80.552
	9	175.695	93.515	74.163	73.67
	10	169.122	97.334	73.382	73.557
	Figure 3R, Supplementary Figure 5Y,5Z
	Condition	mock
	Genotype	Tak-1	mGFP-MpSYP12B	amiR-Ctrl#3	amiR-Ctrl#5	amiR-MpRET1-1#2	amiR-MpRET1-1#5	amiR-MpRET1-2#4	amiR-MpRET1-2#5	amiR-MpSEC21-1#1	amiR-MpSEC21-1#3	amiR-MpSEC21-2#3	amiR-MpSEC21-2#4
	mean	196.501	181.921	179.501	185.182	170.882	172.848	133.485	136.317	182.159	184.993	182.72	182.592
	s.d.	8.7293	15.8568	12.6881	13.73	12.4197	10.0946	24.0672	18.8446	14.526	15.5942	11.4693	13.9408
	p-value	2.992×10-02	-	0.7251	0.6466	0.1185	0.1679	1.305×10-04	3.150×10-05	0.9739	0.6834	0.904	0.9251
	# of replicates	n = 10	n = 10	n = 10	n = 10	n = 10	n = 10	n = 10	n = 10	n = 10	n = 10	n = 10	n = 10
	1	194.605	170.494	187.207	187.193	174.133	181.996	122.336	142.972	174.095	186.883	183.039	178.339
	2	199.235	183.867	193.512	196.874	146.55	163.369	97.13	126.724	160.394	156.541	177.45	155.674
	3	193.425	183.359	196.903	200.508	170.372	173.325	89.557	137.677	210.168	203.634	201.678	195.585
	4	189.258	153.078	190.597	193.156	173.09	162.215	142.824	153.671	193.245	213.212	199.321	189.836
	5	194.316	178.811	171.281	194.028	188.838	178.346	147.174	136.284	172.576	191.584	184.513	174.754
	6	183.517	164.755	176.667	181.005	166.932	160.905	140.211	102.133	169.084	168.116	177.744	173.443
	7	186.358	184.665	166.482	164.24	151.625	158.68	132.585	144.099	174.465	186.815	185.161	171.356
	8	210.595	191.976	176.442	192.85	179.944	178.397	160.877	147.005	197.994	184.887	178.432	206.144
	9	206.917	212.736	153.688	155.989	182.025	186.424	132.014	166.04	191.004	185.235	158.245	186.411
	10	206.779	195.467	182.233	185.974	175.31	184.827	170.139	106.567	178.562	173.025	181.614	194.375
													Unit: mm2
	Condition	β-estradiol
	Genotype	Tak-1	mGFP-MpSYP12B	amiR-Ctrl#3	amiR-Ctrl#5	amiR-MpRET1-1#2	amiR-MpRET1-1#5	amiR-MpRET1-2#4	amiR-MpRET1-2#5	amiR-MpSEC21-1#1	amiR-MpSEC21-1#3	amiR-MpSEC21-2#3	amiR-MpSEC21-2#4
	mean	172.005	169.653	156.228	166.796	14.45	14.102	12.115	13.679	12.501	17.833	13.51	15.804
	s.d.	13.7432	14.6947	14.8641	9.5134	1.4199	0.7663	0.8696	1.9886	0.9982	1.2739	1.7056	1.2252
	p-value	0.7299	-	6.993×10-02	0.6313	1.153×10-10	1.377×10-10	1.200×10-10	8.447×10-11	1.187×10-10	1.487×10-10	9.653×10-11	1.341×10-10
	# of replicates	n = 10	n = 10	n = 10	n = 10	n = 10	n = 10	n = 10	n = 10	n = 10	n = 10	n = 10	n = 10
	1	163.796	162.944	143.964	156.234	16.35	13.79	10.692	14.794	12.758	16.934	16.502	16.756
	2	164.033	151.695	175.715	183.792	14.79	13.175	11.809	14.503	12.049	16.524	12.887	17.908
	3	172.44	155.453	160.101	178.598	14.336	12.629	12.207	16.26	12.577	17.409	11.476	16.292
	4	201.57	161.629	159.434	174.727	12.342	14.749	13.332	15.191	13.324	17.398	12.666	15.945
	5	163.674	166.336	158.129	159.152	12.764	14.342	10.738	14.66	14.403	17.44	12.17	16.442
	6	173.371	181.402	133.781	155.6	13.455	13.786	12.085	12.934	13.043	17.645	15.755	14.76
	7	174.941	168.257	169.868	157.886	13.004	15.444	12.923	12.345	11.142	19.932	12.696	13.592
	8	155.581	206.131	178.739	172.117	16.237	14.069	13.292	15.414	12.667	17.591	14.748	14.517
	9	191.319	166.954	139.483	163.518	15.899	14.625	11.984	10.601	10.713	20.611	14.764	15.092
	10	159.322	175.728	143.063	166.333	15.323	14.41	12.085	10.088	12.334	16.85	11.437	16.735
													Unit: mm2
	Condition	5-d
	Genotype	Tak-1	mGFP-MpSYP12B	amiR-Ctrl#3	amiR-Ctrl#5	amiR-MpRET1-1#2	amiR-MpRET1-1#5	amiR-MpRET1-2#4	amiR-MpRET1-2#5	amiR-MpSEC21-1#1	amiR-MpSEC21-1#3	amiR-MpSEC21-2#3	amiR-MpSEC21-2#4
	mean	9.511	8.41	8.061	9.001	8.668	8.957	8.742	8.452	8.1	9.379	7.876	8.393
	s.d.	0.8393	0.8531	0.968	1.1274	0.9694	0.7815	0.8501	1.3073	0.8346	0.6697	0.9153	1.0462
	p-value	2.753×10-04	-	0.2463	7.696×10-02	0.3902	4.630×10-02	0.2365	0.9086	0.2641	4.088×10-04	7.059×10-02	0.9555
	# of replicates	n = 20	n = 20	n = 20	n = 20	n = 20	n = 20	n = 20	n = 20	n = 20	n = 20	n = 20	n = 20
	1	10.128	8.192	7.602	9.676	8.152	9.571	10.599	7.594	7.563	10.163	7.189	7.687
	2	11.134	8.155	7.622	10.32	6.728	8.104	8.934	9.554	7.157	9.155	6.943	6.971
	3	9.023	9.768	7.993	9.838	8.282	10.375	7.962	8.067	9.868	9.339	7.972	9.273
	4	8.923	7.974	6.352	8.499	8.888	7.823	9.599	7.868	8.679	10.175	7.052	7.123
	5	8.971	7.719	6.872	11.253	9.434	8.633	7.493	7.026	7.631	8.793	7.522	7.239
	6	8.89	8.778	8.259	7.852	8.207	7.308	8.675	6.968	8.049	8.6	6.461	7.927
	7	7.828	7.511	7.962	7.448	8.101	8.773	8.217	8.036	8.368	10.482	9.513	7.495
	8	9.238	9.415	10.134	8.639	9.568	9.45	9.787	10.567	10.323	9.359	7.216	9.403
	9	9.566	8.293	6.345	7.958	7.593	7.978	7.78	8.005	7.988	9.003	9.749	7.435
	10	8.82	9.052	8.25	10.643	9.267	9.293	9.148	7.957	7.328	8.893	8.158	7.621
	11	9.871	7.871	8.169	9.837	10.658	9.082	7.482	10.154	7.989	9.435	8.926	9.175
	12	9.778	7.368	8.156	9.034	9.201	9.075	9.156	8.595	7.622	9.261	8.373	10.191
	13	10.038	7.27	7.854	10.013	8.451	8.2	9.155	11.091	7.724	9.115	7.189	9.899
	14	10.709	7.963	9.793	8.785	7.524	9.449	8.984	9.317	8.33	8.972	7.25	7.946
	15	8.556	7.376	7.669	9.967	7.513	9.023	7.264	8.174	8.697	8.645	7.75	9.932
	16	8.946	8.887	8.642	7.669	8.775	9.681	9.035	8.454	8.399	9.531	8.44	8.158
	17	9.683	8.164	9.166	7.083	8.143	10.137	8.984	8.594	7.36	10.496	7.703	7.582
	18	10.46	10.599	8.891	8.505	10.485	9.724	9.732	10.186	8.591	9.298	9.393	8.04
	19	10.863	8.899	7.037	9.068	9.351	9.034	8.668	6.832	7.053	10.671	7.852	8.815
	20	8.788	8.947	8.46	7.931	9.031	8.426	8.194	5.991	7.275	8.201	6.868	9.941
													Unit: mm2

## Sheet: Figure4,S7
	Figure 4C, Supplementary Figure 7
		MpSEC21-mCitrine		MpRET1-mCitrine		mCitrine-MpGOS11		MpERD2-mCitrine		mCitrine-MpSYP4		mCitrine-MpRAB5		MpIDH1-mCitrine
	Localization	COPI vesicle		COPI vesicle		Golgi apparatus		Golgi apparatus		trans-Golgi network		Multivesicular body		Mitochondrion
	Transgene allele	#2	#3	#1	#2	#4	#7	#1	#6	#2	#3	#5	#6	#1	#3
	mean	0.88	0.87	0.8	0.82	0.73	0.69	0.71	0.71	0.39	0.41	0.26	0.29	0.11	0.11
	s.d.	0.026	0.025	0.061	0.039	0.052	0.04	0.023	0.02	0.039	0.039	0.043	0.05	0.034	0.034
	p-value		0.11	2.33×10-11	2.25×10-13	6.71×10-28	6.80×10-38	6.52×10-47	3.74×10-47	2.60×10-74	3.96×10-83	7.07×10-73	5.64×10-71	8.70×10-102	7.25×10-94
	# of replicates	n = 42	n = 48	n = 50	n = 51	n = 52	n = 44	n = 47	n = 46	n = 48	n = 56	n = 45	n = 50	n = 51	n = 46
	1	0.89	0.85	0.77	0.78	0.77	0.65	0.74	0.7	0.42	0.53	0.25	0.23	0.12	0.09
	2	0.86	0.89	0.73	0.85	0.76	0.72	0.7	0.74	0.39	0.43	0.29	0.28	0.13	0.12
	3	0.78	0.87	0.81	0.79	0.76	0.72	0.72	0.72	0.45	0.45	0.29	0.25	0.11	0.08
	4	0.91	0.93	0.76	0.73	0.76	0.76	0.71	0.73	0.4	0.4	0.18	0.23	0.14	0.08
	5	0.91	0.89	0.85	0.71	0.79	0.7	0.72	0.71	0.39	0.43	0.21	0.22	0.12	0.08
	6	0.89	0.85	0.77	0.81	0.57	0.7	0.71	0.73	0.33	0.37	0.19	0.35	0.12	0.05
	7	0.86	0.83	0.83	0.86	0.76	0.63	0.72	0.75	0.39	0.41	0.25	0.39	0.16	0.07
	8	0.88	0.85	0.85	0.88	0.77	0.59	0.73	0.71	0.36	0.38	0.21	0.36	0.12	0.15
	9	0.88	0.88	0.71	0.83	0.67	0.65	0.73	0.71	0.35	0.52	0.24	0.37	0.11	0.12
	10	0.89	0.89	0.66	0.81	0.68	0.71	0.75	0.71	0.46	0.44	0.28	0.32	0.22	0.11
	11	0.87	0.87	0.69	0.79	0.66	0.73	0.76	0.72	0.4	0.48	0.24	0.35	0.14	0.13
	12	0.84	0.83	0.76	0.85	0.72	0.74	0.73	0.67	0.36	0.4	0.26	0.31	0.14	0.08
	13	0.88	0.87	0.75	0.89	0.67	0.72	0.71	0.71	0.44	0.42	0.23	0.28	0.14	0.06
	14	0.87	0.86	0.72	0.83	0.71	0.68	0.69	0.71	0.44	0.41	0.25	0.34	0.14	0.07
	15	0.91	0.84	0.82	0.85	0.57	0.69	0.71	0.68	0.38	0.39	0.27	0.33	0.14	0.11
	16	0.88	0.86	0.75	0.86	0.75	0.66	0.72	0.68	0.39	0.39	0.29	0.29	0.12	0.09
	17	0.9	0.9	0.81	0.84	0.78	0.72	0.73	0.72	0.47	0.39	0.3	0.21	0.17	0.11
	18	0.89	0.88	0.85	0.85	0.78	0.63	0.74	0.69	0.39	0.39	0.26	0.17	0.09	0.16
	19	0.88	0.89	0.73	0.85	0.81	0.68	0.71	0.69	0.34	0.39	0.23	0.29	0.14	0.16
	20	0.84	0.86	0.72	0.85	0.73	0.69	0.76	0.73	0.31	0.37	0.37	0.27	0.07	0.1
	21	0.88	0.82	0.8	0.78	0.81	0.65	0.68	0.69	0.34	0.39	0.26	0.26	0.16	0.13
	22	0.83	0.88	0.71	0.8	0.79	0.71	0.74	0.7	0.38	0.41	0.28	0.25	0.09	0.15
	23	0.9	0.88	0.74	0.75	0.76	0.66	0.74	0.69	0.33	0.45	0.32	0.3	0.08	0.13
	24	0.87	0.86	0.72	0.83	0.77	0.69	0.71	0.69	0.44	0.38	0.24	0.27	0.12	0.15
	25	0.87	0.86	0.73	0.77	0.78	0.69	0.69	0.69	0.4	0.43	0.34	0.22	0.07	0.15
	26	0.86	0.83	0.67	0.77	0.75	0.62	0.74	0.7	0.37	0.34	0.25	0.17	0.11	0.16
	27	0.85	0.86	0.79	0.77	0.73	0.75	0.7	0.71	0.31	0.45	0.27	0.25	0.08	0.13
	28	0.87	0.91	0.87	0.82	0.76	0.72	0.69	0.73	0.35	0.41	0.24	0.36	0.19	0.08
	29	0.88	0.84	0.85	0.82	0.77	0.72	0.69	0.71	0.38	0.36	0.24	0.29	0.1	0.15
	30	0.89	0.89	0.85	0.84	0.77	0.69	0.66	0.75	0.41	0.38	0.28	0.35	0.14	0.09
	31	0.86	0.9	0.87	0.87	0.79	0.73	0.69	0.71	0.36	0.38	0.31	0.26	0.08	0.17
	32	0.86	0.91	0.88	0.84	0.77	0.7	0.73	0.73	0.39	0.44	0.29	0.3	0.14	0.11
	33	0.93	0.84	0.81	0.83	0.75	0.69	0.72	0.74	0.38	0.42	0.28	0.31	0.06	0.11
	34	0.89	0.88	0.76	0.87	0.77	0.74	0.72	0.72	0.42	0.54	0.32	0.31	0.09	0.18
	35	0.88	0.87	0.85	0.83	0.75	0.72	0.69	0.72	0.43	0.37	0.35	0.35	0.09	0.14
	36	0.88	0.83	0.82	0.77	0.73	0.72	0.68	0.71	0.42	0.39	0.23	0.32	0.07	0.12
	37	0.9	0.8	0.84	0.77	0.75	0.74	0.73	0.68	0.42	0.42	0.23	0.24	0.13	0.15
	38	0.9	0.87	0.85	0.81	0.7	0.74	0.74	0.71	0.44	0.41	0.25	0.32	0.11	0.07
	39	0.87	0.84	0.86	0.81	0.71	0.67	0.7	0.72	0.48	0.43	0.22	0.3	0.12	0.08
	40	0.88	0.86	0.83	0.8	0.72	0.72	0.75	0.69	0.38	0.47	0.24	0.36	0.08	0.11
	41	0.86	0.87	0.82	0.79	0.75	0.66	0.71	0.71	0.43	0.39	0.21	0.28	0.07	0.12
	42	0.84	0.89	0.81	0.78	0.77	0.66	0.7	0.69	0.43	0.41	0.19	0.29	0.07	0.07
	43		0.88	0.87	0.78	0.65	0.61	0.66	0.7	0.4	0.39	0.22	0.29	0.1	0.09
	44		0.87	0.86	0.84	0.73	0.64	0.71	0.75	0.38	0.41	0.33	0.3	0.09	0.09
	45		0.86	0.88	0.86	0.71		0.69	0.73	0.39	0.4	0.22	0.26	0.11	0.06
	46		0.87	0.85	0.82	0.77		0.71	0.74	0.39	0.37		0.27	0.11	0.05
	47		0.86	0.83	0.81	0.73		0.72		0.38	0.39		0.35	0.1
	48		0.87	0.87	0.77	0.71				0.38	0.39		0.27	0.14
	49			0.86	0.83	0.68					0.39		0.35	0.06
	50			0.85	0.86	0.7					0.41		0.26	0.05
	51				0.83	0.73					0.43			0.1
	52					0.63					0.37
	53										0.4
	54										0.41
	55										0.41
	56										0.37

## Sheet: Figure5,S8
											Figure 5B				Figure 5D				Figure 5F				Figure 5H
	Figure 5										Distance [μm]	Relative fluorescent intensity from mCitrine	Relative fluorescent intensity from mCherry		Distance [μm]	Relative fluorescent intensity from mCitrine	Relative fluorescent intensity from mCherry		Distance [μm]	Relative fluorescent intensity from mCitrine	Relative fluorescent intensity from mCherry		Distance [μm]	Relative fluorescent intensity from mCitrine	Relative fluorescent intensity from mCherry
	Transgene	MpSEC21-mCitrine		MpRET1-mCitrine		mCitrine-MpGOS11		MpERD2-mCitrine			0	7.86	3.56		0	1.92	6.03		0	4.53	9.42		0	4.84	10.14
	Transgene allele	#2	#3	#1	#2	#4	#7	#1	#6		0.033	7.06	3.9		0.033	2.21	6.68		0.033	4.2	8.62		0.033	4.54	10.99
	# of observation	n = 22	n = 21	n = 25	n = 26	n = 28	n = 26	n = 30	n = 29		0.066	7.03	4.21		0.066	2.58	6.9		0.066	4.13	8.58		0.066	4.54	11.84
											0.1	6.91	4.56		0.099	2.81	6.73		0.1	4.78	8.4		0.1	4.99	12.88
	Supplementary Figure 8										0.133	7.62	4.66		0.132	2.87	6.4		0.133	5.24	8.44		0.133	5.34	13.86
	Transgene	mCitrine-MpSYP4		mCitrine-MpRAB5							0.166	8.02	4.5		0.165	2.84	6.28		0.166	5.51	8.48		0.166	5.34	14.72
	Transgene allele	#2	#3	#5	#6						0.199	8.63	4.14		0.198	2.76	6.43		0.199	5.83	8.26		0.199	4.99	15.43
	# of observation	n = 25	n = 28	n = 28	n = 29						0.232	8.63	4.02		0.231	2.63	6.65		0.233	6.12	7.82		0.233	3.89	16.96
											0.266	8.08	4.02		0.264	2.42	6.9		0.266	6.24	7.57		0.266	3.29	18.21
											0.299	8.08	4.02		0.297	2.37	7.62		0.299	6.12	7.71		0.299	2.99	19.74
											0.332	6.88	4.08		0.33	2.84	9.62		0.332	5.78	8.29		0.332	3.04	21.58
											0.365	5.77	4.35		0.363	4.36	13.18		0.366	5.43	9.09		0.366	3.49	23.6
											0.398	5.33	4.48		0.396	7.6	17.81		0.399	5.14	9.85		0.399	4.74	26.6
											0.431	5.52	4.7		0.43	12.93	22.67		0.432	4.93	10.58		0.432	5.59	29.48
											0.465	5.83	4.37		0.463	20.16	27.65		0.465	4.78	11.3		0.465	6.84	32.75
											0.498	6.81	4.06		0.496	28.34	33.48		0.499	4.61	11.77		0.499	8.93	36.92
											0.531	6.81	4.06		0.529	36.49	40.86		0.532	4.51	11.7		0.532	13.72	44.55
											0.564	7.18	4.17		0.562	44.14	49.5		0.565	4.51	11.05		0.565	18.91	51.37
											0.597	6.94	4.64		0.595	51.18	58.17		0.598	4.59	10.14		0.598	25.05	58.55
											0.631	7.62	5.82		0.628	57.39	65.45		0.631	4.76	9.78		0.632	32.04	65.1
											0.664	8.54	6.88		0.661	61.86	70.63		0.665	4.99	10.79		0.665	39.67	70.93
											0.697	10.24	8.31		0.694	63.91	73.62		0.698	5.2	13.62		0.698	51.3	80.48
											0.73	11.22	9.7		0.727	63.77	74.59		0.731	5.41	18.25		0.731	58.88	85.73
											0.763	14	13.12		0.76	62.67	73.69		0.764	5.91	24.38		0.765	65.32	88.65
											0.797	14	13.12		0.793	61.38	71.35		0.798	7.31	31.55		0.798	71.16	88.6
											0.83	19.95	20.25		0.826	59.46	68.21		0.831	9.23	35.28		0.831	76.5	86.77
											0.863	25.81	27.77		0.859	55.94	64.9		0.864	12.8	44.08		0.864	80.64	82.55
											0.896	41.6	42.94		0.892	50.58	61.51		0.897	18.04	54.73		0.897	83.33	82.41
											0.929	52.36	55.65		0.925	44.64	57.82		0.931	24.97	66.71		0.931	84.98	83.22
											0.963	72.65	74.67		0.958	39.96	53.74		0.964	33.16	78.59		0.964	86.53	82.1
											0.996	80.14	86.92		0.991	37.67	49.73		0.997	42.31	88.41		0.997	87.72	75.86
											1.029	87.88	90.67		1.024	37.25	46.69		1.03	52.35	95.04		1.03	88.27	68.91
											1.062	91.92	98.63		1.057	37.15	45.22		1.064	62.81	98.3		1.064	87.23	62.4
											1.095	94.97	100		1.09	36.46	45.39		1.097	71.94	98.52		1.097	84.68	58.28
											1.129	92.69	95.73		1.123	37.43	47.81		1.13	77.78	95.73		1.13	82.19	56.84
											1.162	80.48	82.47		1.156	39.38	49.58		1.163	80.31	89.86		1.163	80.14	57.65
											1.195	70.74	72.43		1.189	43.61	52.12		1.196	81.54	81.27		1.197	81.64	57.92
											1.228	54.02	56.95		1.222	48.58	54.78		1.23	82.79	71.31		1.23	84.18	57.74
											1.261	47.39	52.33		1.256	52.79	57.13		1.263	83	61.9		1.263	86.58	57.65
											1.294	40.02	44.35		1.289	56.15	59.57		1.296	74.34	51.47		1.296	84.63	60.7
											1.328	30.77	36.14		1.322	59.78	63.45		1.329	67.76	51.32		1.33	87.33	64.74
											1.361	30	32.58		1.355	64.98	70.1		1.363	63.35	53.13		1.363	90.57	70.79
											1.394	29.02	30.67		1.388	72.58	79.27		1.396	62.56	55.09		1.396	93.86	77.7
											1.427	30.99	30.72		1.421	82.39	88.96		1.429	64.77	56.39		1.429	96.81	83.94
											1.46	30.37	30.96		1.454	92.38	96.49		1.462	68.24	57.26		1.463	97.11	89.14
											1.494	32.81	32.37		1.487	99.16	100		1.496	71.56	58.17		1.496	98.65	92.19
											1.527	30.13	31.71		1.52	100	99.13		1.529	74.71	58.75		1.529	99.5	94.93
											1.56	34.38	33.06		1.553	94.74	94.44		1.562	78.53	58.02		1.562	100	97.35
											1.593	39.28	34.92		1.586	85.12	86.52		1.595	83.46	55.96		1.596	99.6	98.97
											1.626	46.16	35.65		1.619	72.56	75.93		1.629	88.14	53.75		1.629	94.51	100
											1.66	53.59	41.97		1.652	57.91	63.58		1.662	92.21	54.73		1.662	88.77	99.24
											1.693	59.05	46.57		1.685	42.74	50.87		1.695	96.51	59.54		1.695	79.84	97.58
											1.726	66.94	60.89		1.718	29.6	39.39		1.728	99.75	67.55		1.728	69.51	94.66
											1.759	66.94	60.89		1.751	20.35	30.17		1.761	100	77.07		1.762	59.58	91.16
											1.792	77.89	76.41		1.784	14.77	23.37		1.795	96.16	86.42		1.795	49.1	82.05
											1.826	85.08	83.38		1.817	11.25	18.56		1.828	88.77	94.1		1.828	38.27	70.08
											1.859	96.02	91.79		1.85	8.52	15.22		1.861	79.01	98.91		1.861	28.19	57.38
											1.892	100	92.14		1.883	6.44	12.9		1.894	67.84	100		1.895	20.16	46.3
											1.925	96.52	86.88		1.916	5.23	11.34		1.928	56	96.96		1.928	14.57	39.12
											1.958	90.97	79.75		1.949	4.68	10.19		1.961	44.39	90.04		1.961	10.38	33.24
											1.991	83.26	72.81		1.982	4.21	9.27		1.994	34.12	80.22		1.994	7.49	29.39
											2.025	73.51	62.59		2.015	3.52	8.4		2.027	25.89	69		2.028	5.89	26.78
											2.058	53.13	43.25		2.048	2.87	7.52		2.061	19.75	57.95		2.061	5.89	26.78
											2.091	34.69	27.15		2.082	2.55	6.73		2.094	15.33	47.99		2.094	5.14	25.53
											2.124	27.1	20.44		2.115	2.66	6.05		2.127	11.96	39.26		2.127	5.64	23.64
											2.157	17.33	13.76		2.148	2.87	5.51		2.16	9.25	31.47		2.161	6.24	21.94
											2.191	13.94	12		2.181	2.87	5.01		2.194	7.27	24.63		2.194	6.39	20.5
											2.224	8.85	10.53		2.214	2.71	4.56		2.227	6.35	19.12		2.227	6.09	19.34
											2.257	8.85	10.53						2.26	6.39	15.43		2.26	5.19	17.86
											2.29	5.74	9.29						2.293	6.87	13.47		2.294	4.09	16.33
											2.323	4.69	8.58						2.327	7.33	12.75		2.327	3.24	14.85
											2.357	4.01	7.13						2.36	7.77	12.64		2.36	2.74	13.68
											2.39	3.89	6.8						2.393	8.37	12.21		2.393	2.84	12.34
											2.423	3.36	6.51						2.426	9.1	11.88
											2.456	3.58	6.47						2.459	9.73	11.19
											2.489	2.99	6.82						2.493	9.88	10.14
											2.523	3.21	6.82						2.526	9.48	8.91
											2.556	3.02	7.11						2.559	8.92	7.75
											2.589	2.93	7.4						2.592	8.5	6.88
											2.622	2.93	7.59						2.626	8.27	6.3
											2.655	3.24	8						2.659	8.19	5.98
											2.689	3.42	7.46						2.692	8.27	5.87
											2.722	3.42	7.46						2.725	8.58	5.94
											2.755	3.61	7.01
											2.788	3.58	7.13
											2.821	3.36	6.94
											2.854	2.9	6.86
											2.888	2.99	6.07
											2.921	3.05	5.89

## Sheet: Figure6
	Figure 6A						Figure 6B-E
	Genotype	Tak-1	Mpsec28-1	Mpsec28-2ge	Mpsec28-3ge		Transgene	proMpSYP12B: sec-mRFP
	mean	24.5	16.5	13	15		Plant background	Tak-1			Mpsec28-1			Mpsec28-2ge			Mpsec28-3ge
	s.d.	4.884	3.945	1.745	3.061		Transgene allele	#1	#2	#3	#2	#3	#6	#5	#7	#8	#1	#3	#7
	p-value	-	1.333×10-03	3.211×10-05	1.792×10-04		# of observed cells	n = 33	n = 32	n = 33	n = 34	n = 32	n = 34	n = 33	n = 32	n = 32	n = 33	n = 33	n = 32
	# of replicates	n = 10	n = 10	n = 10	n = 10
	1	34.2	13.4	14.2	14		Figure 6F,G
	2	32.8	19.1	10.8	17.9		Transgene	mGFP-MpSYP12B
	3	23.5	16.3	12.5	12.7		Plant background	Tak-1		Mpsec28-1
	4	26.2	21.4	9.8	10		Transgene allele	#21	#22	#2	#8	#9
	5	20.1	9.8	14.2	19.9		# of observed cells	n = 45	n = 45	n = 41	n = 41	n = 42
	6	19.2	18.6	14.6	13.7
	7	22.1	16.4	15.1	13.8
	8	21.3	22.6	11.1	18.8
	9	22	11.2	14.3	12.1
	10	23.1	15.7	12.9	17

## Sheet: Supplementary Figure6
	Figure 6C
			MpSEC28 (Mp1g28220)
			Tak-1	Mperf13-1ge
	Biological replicate #1	Technical replicate 1	1.0175	1.0453
		Technical replicate 2	1.0041	1.1522
		Technical replicate 3	0.9784	0.9117
	Biological replicate #2	Technical replicate 1	1.0634	0.6879
		Technical replicate 2	0.9919	1.1673
		Technical replicate 3	0.9446	1.0961
	Biological replicate #3	Technical replicate 1	1.0766	0.9887
		Technical replicate 2	0.9959	1.1321
		Technical replicate 3	0.9275	1.165
		mean	1	1.038
		s.d.	0.046	0.1487
		p-value		0.5012
